# Supplementary material
Source: PubMed Central journal article supplement (PMC2696149)
Supplement: 00015.2009_1.pdf [file 00015.2009_1.pdf]

Supplementary TABLE A.

Rat genome database (RGD) official nomenclature of strains and congenic sublimes used in the present investigation

| Abbreviation           | Official Nomenclature                                                          |
|------------------------|--------------------------------------------------------------------------------|
| DR. <sup>lyp/lyp</sup> | BBDR.BBDP-( <i>D4Rhw11-D4Rhw10</i> )/Rhw                                       |
| DRF. <sup>ff</sup>     | BBDR.F344-( <i>D4Rat153-D4Rhw8</i> ).BBDP-( <i>D4Rhw6-D4Rat62</i> )/Rhw        |
| DRF.A                  | BBDR.F344-( <i>D4Rat253-D4Rhw8</i> ).BBDP-( <i>D4Rhw6-D4Rat62</i> )/Rhw        |
| DRF.B                  | BBDR.F344-( <i>D4Got33-D4Rhw8</i> ).BBDP-( <i>D4Rhw6-D4Rat62</i> )/Rhw         |
| DRF.C                  | BBDR.F344-( <i>rs8168904-D4Rhw8</i> ).BBDP-( <i>D4Rhw6-D4Rat62</i> )/Rhw       |
| DRF.D                  | BBDR.F344-( <i>SS105325016 -D4Rhw8</i> ).BBDP-( <i>D4Rhw6-D4Rat62</i> )/Rhw    |
| DRF.E                  | BBDR.F344-( <i>D4Rat153- SS99306861</i> ).BBDP-( <i>D4Rhw11-D4Rhw10</i> )/Rhw  |
| DRF.F                  | BBDR.F344-( <i>D4Rat253- SS99306861</i> ).BBDP-( <i>D4Rhw11-D4Rhw10</i> )/Rhw  |
| DRF.G                  | BBDR.F344-( <i>D4Arb11- SS99306861</i> ).BBDP-( <i>D4Rhw11-D4Rhw10</i> )/Rhw   |
| DRF.H                  | BBDR.F344-( <i>rs8168904- SS99306861</i> ).BBDP-( <i>D4Rhw11-D4Rhw10</i> )/Rhw |
| DRF.I                  | BBDR.F344-( <i>SS105442099-D4Rhw8</i> ).BBDP-( <i>D4Rhw6- D4Rat62</i> )/Rhw    |
| DRF.J                  | BBDR.F344-( <i>D4Rat26-D4Rhw8</i> ).BBDP-( <i>D4Rhw6- D4Rat62</i> )/Rhw        |
| DRF.K                  | BBDR.F344-( <i>D4Rat27-D4Rhw8</i> ).BBDP-( <i>D4Rhw6- D4Rat62</i> )/Rhw        |
| DRF.L                  | BBDR.F344-( <i>D4Got59-D4Rhw8</i> ).BBDP-( <i>D4Rhw6- D4Rat62</i> )/Rhw        |

Congenic lines are named according to the *Condensed Strain Nomenclature Guidelines* at

[http://rgd.mcw.edu/nomen/quick\\_guide\\_strain\\_nomenclature.html](http://rgd.mcw.edu/nomen/quick_guide_strain_nomenclature.html). Official naming of a

congenic line is defined as an abbreviated symbol of the recipient strain, period, abbreviated symbol of the donor strain, hyphen, most proximal and distal flanking markers in parenthesis separated by a hyphen (in italics), slash, ILAR code of the lab. The proximal and distal F344 DNA markers are detailed in Figure 1.
