# Supplementary material
Source: PubMed Central journal article supplement (PMC2696149)
Supplement: 00015.2009_3.pdf [file 00015.2009_3.pdf]

Supplementary TABLE C  
Sequencing and Detection of Coding SNP's in Region 2

| <i>Genbank</i>    |                            |                  |                                                                  | <i>mRNA</i>      |            |            |              |            | <i>A.A</i>                  |                          |
|-------------------|----------------------------|------------------|------------------------------------------------------------------|------------------|------------|------------|--------------|------------|-----------------------------|--------------------------|
| <i>Accession:</i> | <i>Gene Name:</i>          | <i>Location:</i> | <i>Identifier:</i>                                               | <i>Position:</i> | <i>DP:</i> | <i>DR:</i> | <i>F344:</i> | <i>BN:</i> | <i>Change:</i>              | <i>SNP (SS) #/Notes:</i> |
|                   | <b>SSLP Marker D4Got59</b> | <b>76492998</b>  | <b>PROXIMAL DR DNA FLANKING MARKER IN DRF SUBCONGENIC LINE K</b> |                  |            |            |              |            |                             |                          |
| 1.)               | Zfp467 <sup>†</sup>        | 76522001         | NM_001024327                                                     | 1024             | T          | C          | T            | C          | P 342 S                     | SS105325093              |
|                   |                            |                  |                                                                  | 1726             | A          | T          | T            | T          | S 576 T                     | SS105325094              |
|                   | <b>SSLP Marker D4Rhw18</b> | <b>76574472</b>  | <b>PROXIMAL F344 DNA MARKER IN DRF SUBCONGENIC LINE K</b>        |                  |            |            |              |            |                             |                          |
|                   | Sspo                       | 76533300         | NM_001007016                                                     |                  |            |            |              |            |                             | Unsequenced              |
| 2.)               | Atp6v0e2                   | 76621828         | NM_001002253                                                     | 190              | C          | A          | A            | A          | S 64 R                      | SS105143776              |
| 3.)               | Lrrc61                     | 76640815         | NM_001109231                                                     | 528              | T          | C          | C            | C          | Syn                         | SS105143785              |
| 4.)               | Rarres2                    | 76659507         | NM_001013427                                                     | 261              | G          | A          | G            | A          | Syn                         | SS105143741              |
| 5.)               | Repin1                     | 76688429         | NM_001005893                                                     | 429              | T          | C          | C            | C          | Syn                         | SS105143739              |
| 6.)               | Zfp775                     | 76694083         | NM_001107859                                                     |                  |            |            |              |            |                             | No SNP's                 |
| 8.)               | Gimap8                     | 76738163         | NM_001033923                                                     |                  |            |            |              |            |                             | No SNP's                 |
| 9.)               | Gimap9                     | 76765555         | NM_001008398                                                     |                  |            |            |              |            |                             | No SNP's                 |
|                   | <b>SSLP Marker D4Rhw2</b>  | <b>76767725</b>  |                                                                  |                  |            |            |              |            |                             |                          |
| 10.)              | Gimap4                     | 76777679         | NM_173153                                                        | 216              | G          | A          | A            | A          | Syn                         | SS105143744              |
|                   |                            |                  |                                                                  | 510              | A          | G          | G            | G          | Syn                         | SS105143745              |
|                   |                            |                  |                                                                  | 618              | A          | G          | G            | G          | Syn                         | SS105143746              |
|                   |                            |                  |                                                                  | 922              | -          | AT         | -            | AT         | YLN*<br>308-328<br>LELI.... | SS105325169              |
| 11.)              | Gimap6                     | 76794903         | NM_001011968                                                     |                  |            |            |              |            |                             | No SNP's                 |
| 12.)              | Gimap7                     | 76812445         | NM_001024328                                                     | 603              | A          | G          | G            | G          | Syn                         | SS105143763              |
|                   | <b>SSLP Marker D4Rhw6</b>  | <b>76829107</b>  | <b>DISTAL DR/F344 BREAKPOINT IN DRF SUBCONGENIC LINE K</b>       |                  |            |            |              |            |                             |                          |
|                   | Gimap1                     | 76829536         |                                                                  |                  |            |            |              |            |                             | Outside interval         |
|                   | Gimap5                     | 76836521         |                                                                  |                  |            |            |              |            |                             | Outside interval         |
|                   | <b>SSLP Marker D4Rhw8</b>  | <b>76843910</b>  |                                                                  |                  |            |            |              |            |                             |                          |

mRNA position is relative to the ATG start site  
Syn = Synonymous amino acid change  
\* = STOP  
† = missing first 70bp of exon 4

Genbank Accession #'s

1.) FI166173-183 3.) FI160954-965 5.) FI166167-172 7.) FI166184-192 9.) FI160912-914 11.) FI160900-905  
2.) FI160936-944 4.) FI160966-971 6.) FI160945-953 8.) FI160921-934 10.) FI160972-980 12.) FI160906-911
