# Supplementary material
Source: PubMed Central journal article supplement (PMC2696149)
Supplement: 00015.2009_4.pdf [file 00015.2009_4.pdf]

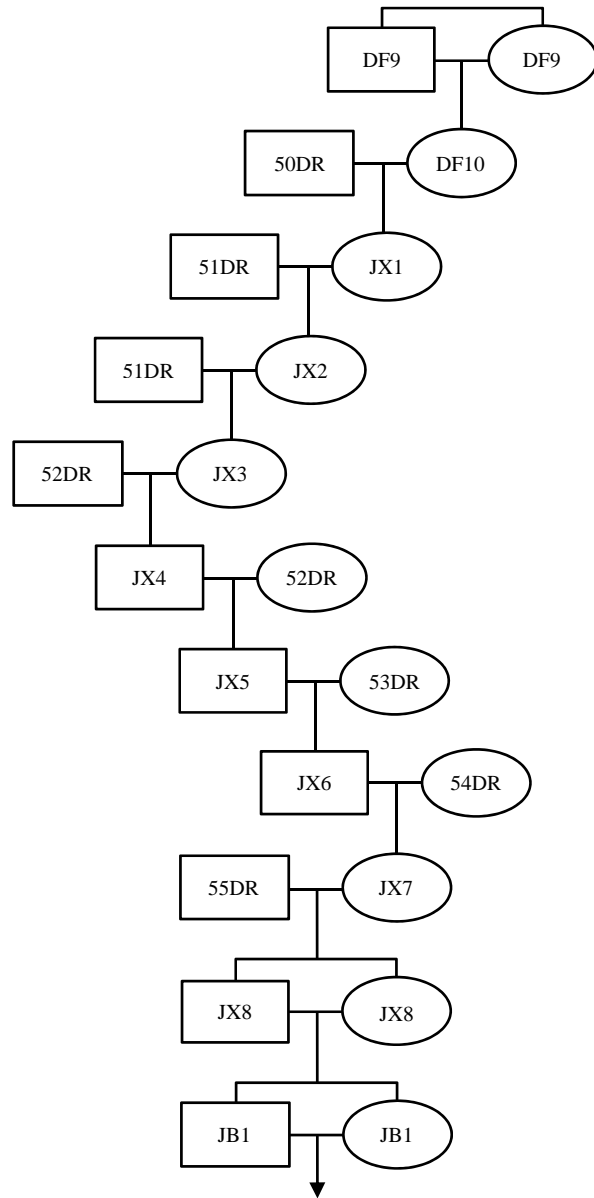

**Supplementary Figure A. Pedigree DF to JB.** DF notations represent the original BBDR.BBDP-(*D4Rhw17-SS99306861*)(*D4Rhw11-D4Rhw10*)/Rhw line. JX generations are heterozygous rats produced from backcrosses of the DF to the inbred BBDR. The associated number represents the generation. JB1 denotes offspring produced from an intercross of two heterozygous DR.*lyp*<sup>+</sup> rats and is the first generation of the BBDR.BBDP-(*D4Rhw11-D4Rhw10*)/Rhw congenic rat line that is currently in its fifth inbred generation.
